# Supplementary material for: Identification of Adsorbed Species and Surface Chemical State on Ag(111) in the Presence of Ethylene and Oxygen Studied with Infrared and X-ray Spectroscopies
Source: MDPI journal article supplement (doi:10.3390/physchem1030020), 2021-11-12
Supplement: s1 [file s1]

Archive with 1 entries (1 files):
- physchem-1423134-supplementary.pdf
